# Supplementary material for: Omitting the Application of Nitrogen or Potassium Reduced the Growth of Young Chestnut (<em>Castanea sativa</em>) Trees, While a Lack of Boron Decreased Fruit Yield
Source: Preprints.org preprint supplement (doi:10.20944/preprints202405.0245.v1), 2024-05-06
Supplement: Supplementary file 1 [file supplementary]

**Supplementary material**

**Omitting the application of nitrogen or potassium reduced the growth of young chestnut (*Castanea sativa*) trees, while a lack of boron decreased fruit yield**

Margarida Arrobas1,2, Soraia Raimundo1,2, Carlos Manuel Correia3, Manuel Ângelo Rodrigues1,2,*

1 Centro de Investigação de Montanha (CIMO), Instituto Politécnico de Bragança, Campus de Santa Apolónia, 5300-253 Bragança, Portugal (M.A.; S.R.);

2 Laboratório para a Sustentabilidade e Tecnologia em Regiões de Montanha, Instituto Politécnico de Bragança, Campus de Santa Apolónia, 5300-253 Bragança, Portugal;

3 Centre for the Research and Technology of Agro-Environmental and Biological Sciences (CITAB), University of Trás-os-Montes and Alto Douro, 5001-801 Vila Real, Portugal (J.M.-P.; C.M.C.).

*Correspondence: [angelor@ipb.pt](mailto:angelor@ipb.pt) (M.Â.R.)

Figure S1. Leaf concentration of nutrients not included in the experimental design, from samples taken in July (J) (2019-2022), in response to fertilizer treatments in a nutrient omission trial. The control received all four nutrients (nitrogen, phosphorus, potassium, and boron, NPKB), while others received only three out of the four, with the missing nutrient marked with (-). LLSR and HLSR are the lower and higher limit of the sufficiency range, respectively. The vertical bars are the standard error of the variance analysis. *, ** and *** significant differences at P < 0.05, P < 0.01 and P < 0.001; ns, not significant.
